# Supplementary material
Source: publisher site journal article supplement (https://www.dovepress.com/article/supplementary_file/563591/563591_Supplementary%20materials_1.docx)
Supplement: Supplementary file 1 [file 563591_Supplementary%20materials_1.docx]

**Supplementary Figure legends**


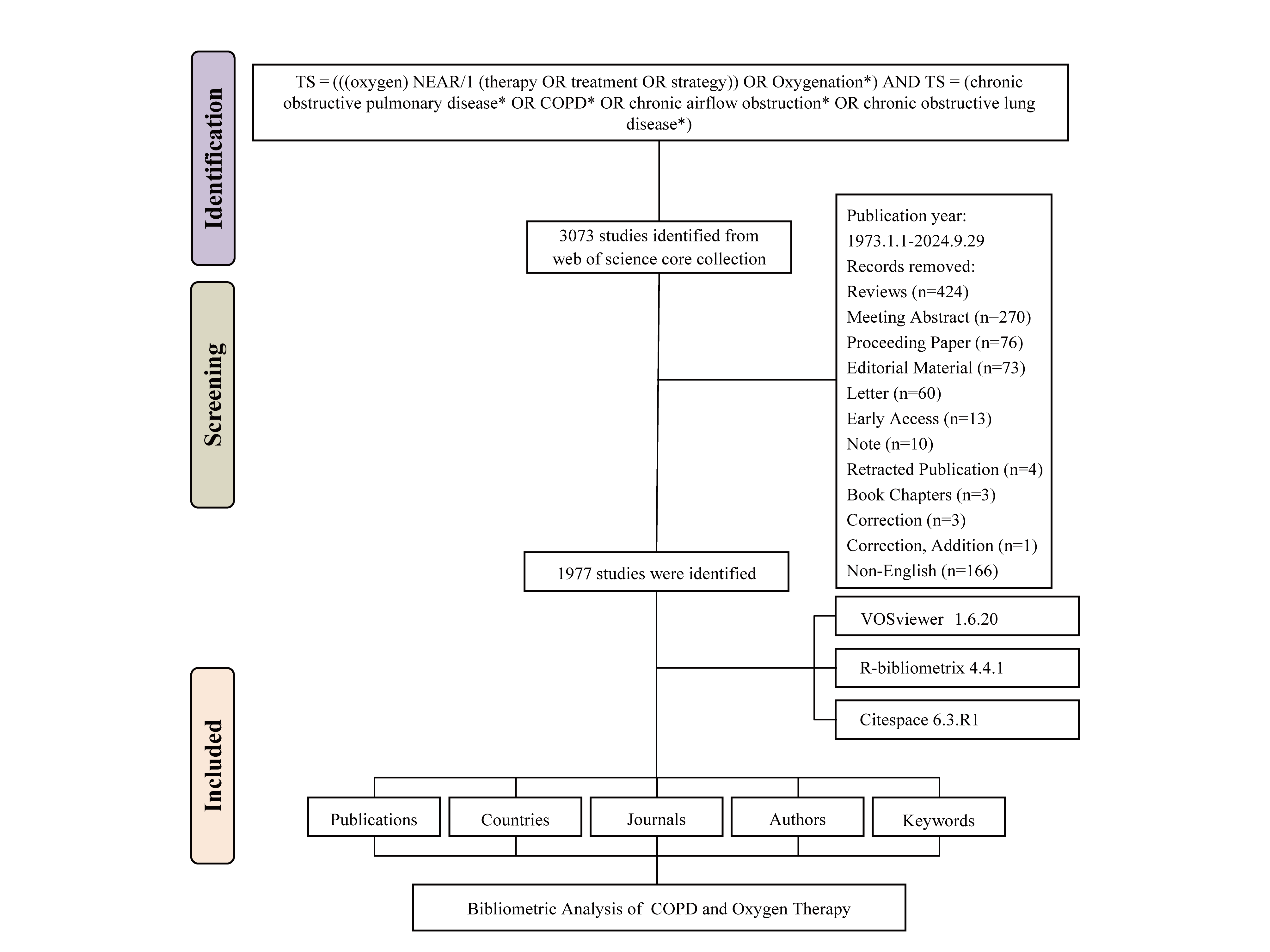


**Figure S1.** Flowchart of the literature screening process.

**
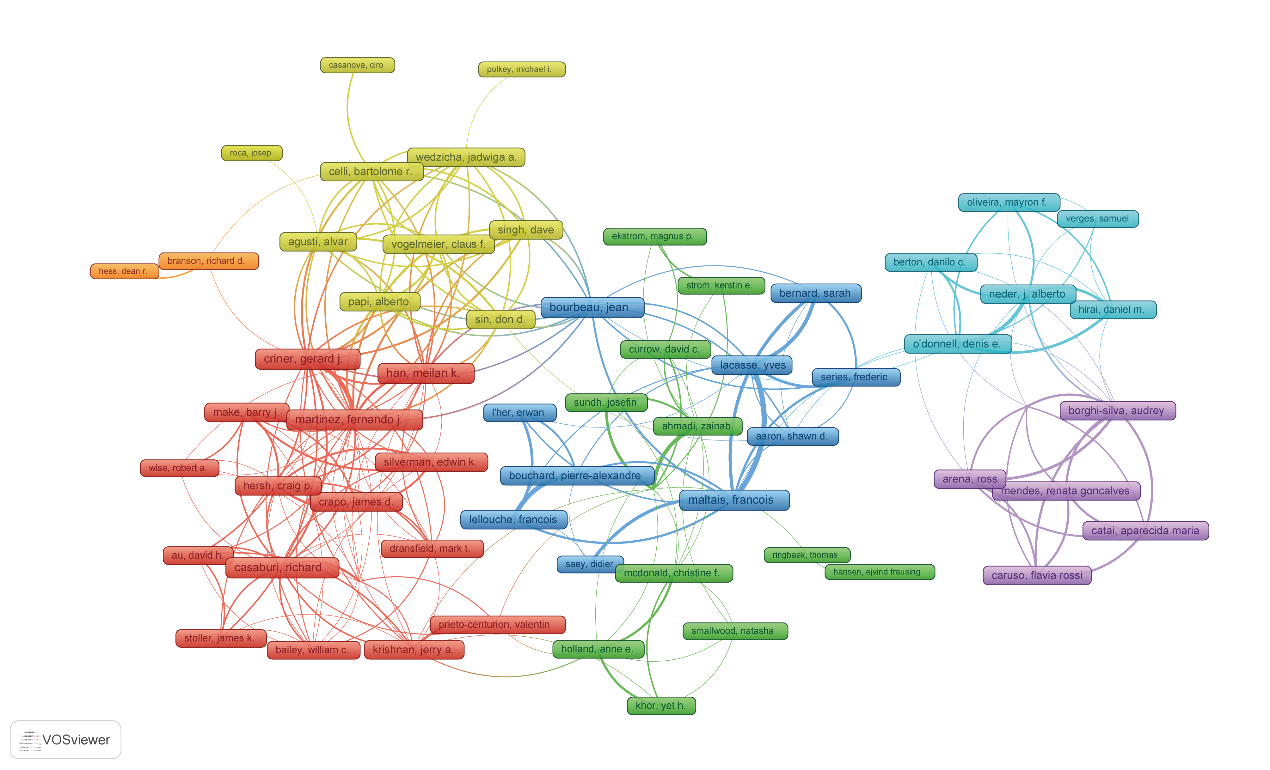
**

**Figure S2.** Visualization map depicting the collaboration among different authors.

**
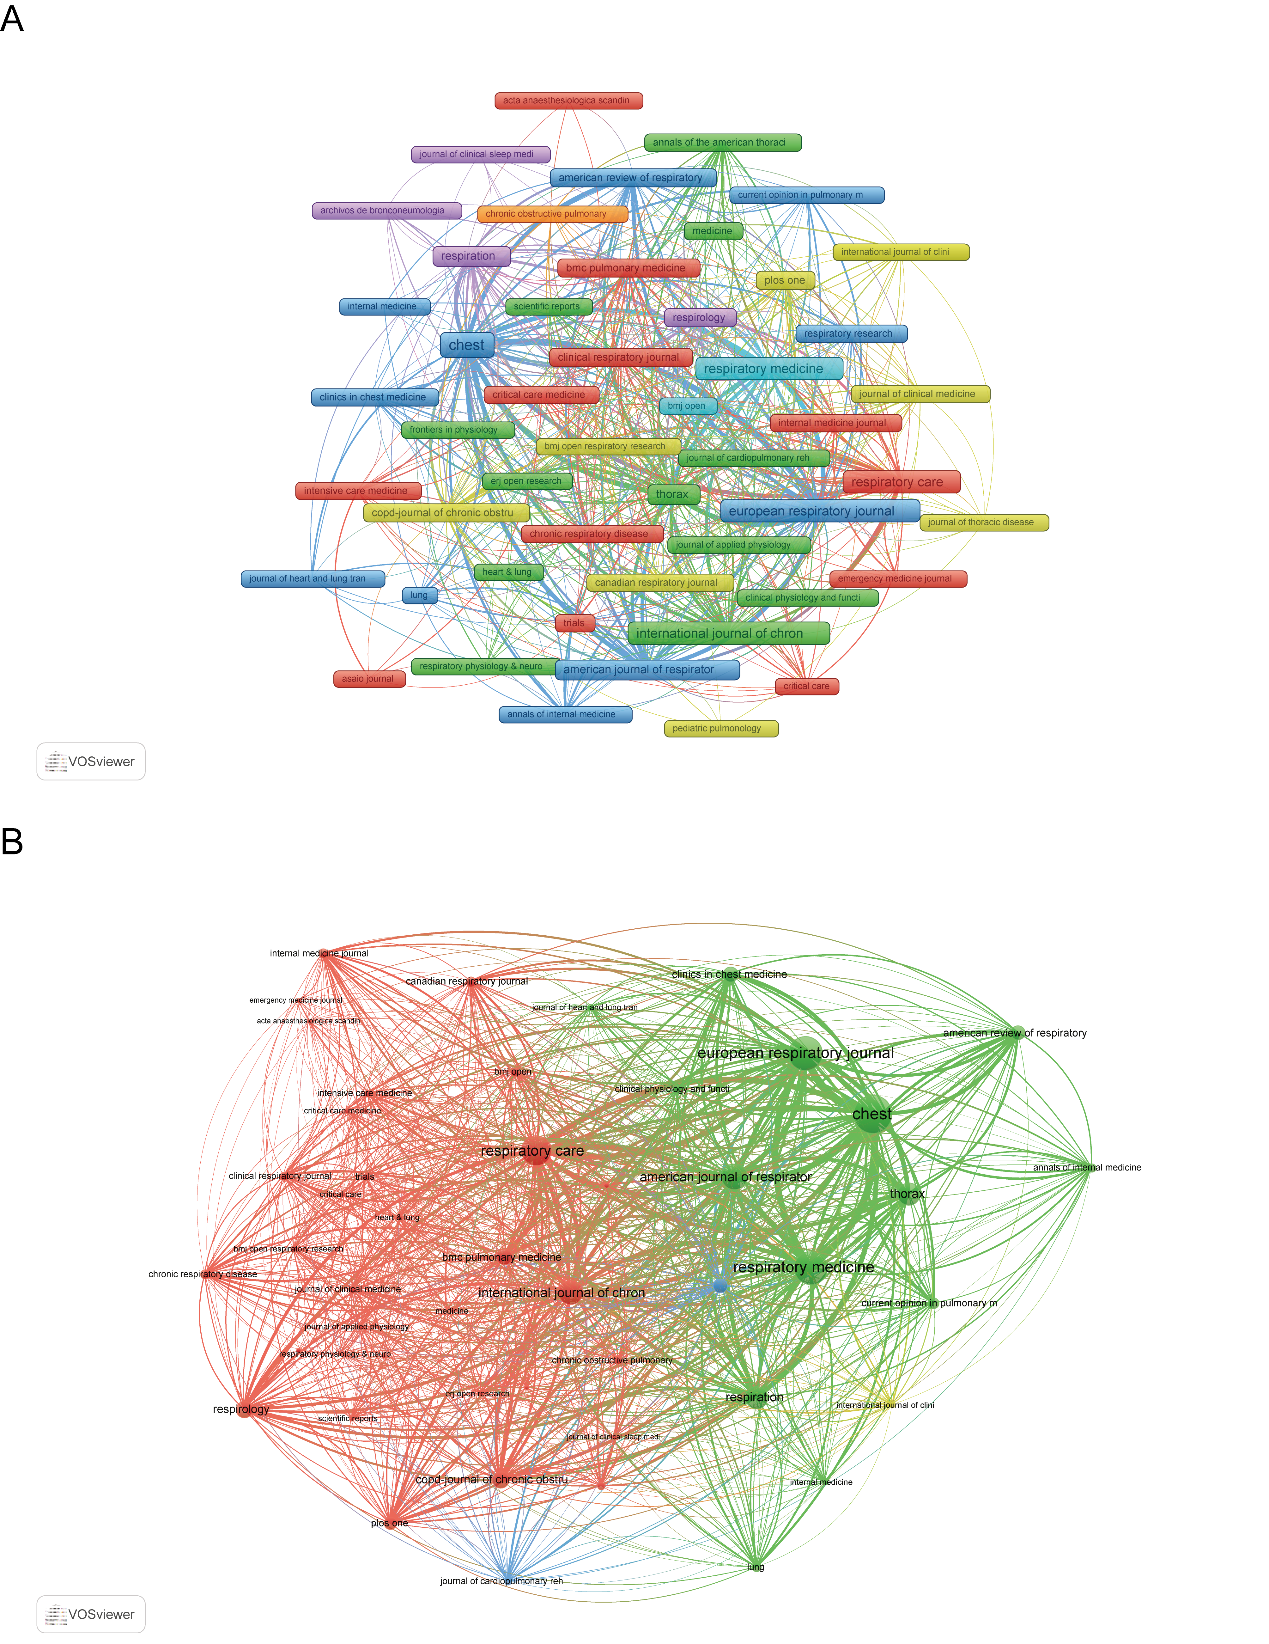
**

**Figure S3**. Analysis of journals. a) Co-occurrence Network of Journals. b) Coupling Network of Journals.

**Table S1 Publication and Citation Profiles of High-Impact Authors**

| **Author** | **h_index** | **g-index** | **m-index** | **PY_start** | **TP** | **TP_Frac** | **TP_rank** | **TC** | **TC_rank** |
| --- | --- | --- | --- | --- | --- | --- | --- | --- | --- |
| WEDZICHA JA | 15 | 15 | 0.405 | 1988 | 15 | 4.87 | 5 | 1275 | 5 |
| WEITZENBLUM E | 13 | 13 | 0.325 | 1985 | 13 | 2.05 | 10 | 2133 | 1 |
| CRINER GERARD J. | 12 | 22 | 0.667 | 2007 | 22 | 2.68 | 2 | 1389 | 4 |
| MALTAIS FRANCOIS | 12 | 25 | 0.667 | 2007 | 25 | 3.54 | 1 | 795 | 12 |
| ZIELINSKI J | 12 | 14 | 0.316 | 1987 | 14 | 2.97 | 8 | 939 | 10 |
| MARTINEZ FERNANDO J. | 11 | 16 | 0.647 | 2008 | 16 | 0.81 | 4 | 1536 | 2 |
| NEDER J. ALBERTO | 11 | 13 | 0.733 | 2010 | 13 | 1.64 | 10 | 285 | 18 |
| AGUSTI ALVAR | 10 | 12 | 0.714 | 2011 | 12 | 0.97 | 14 | 1178 | 6 |
| CELLI BARTOLOME R. | 10 | 14 | 0.526 | 2006 | 14 | 1.69 | 8 | 1085 | 7 |
| EKSTROM MAGNUS | 10 | 21 | 0.667 | 2010 | 21 | 5.33 | 3 | 445 | 13 |
| O'DONNELL DENIS E. | 10 | 12 | 0.714 | 2011 | 12 | 1.41 | 14 | 410 | 15 |
| WINDISCH WOLFRAM | 10 | 15 | 0.556 | 2007 | 15 | 2.16 | 5 | 959 | 8 |
| HAN MEILAN K. | 9 | 13 | 0.692 | 2012 | 13 | 1.24 | 10 | 949 | 9 |
| LACASSE YVES | 9 | 12 | 0.5 | 2007 | 12 | 2 | 14 | 259 | 19 |
| BEASLEY RICHARD | 8 | 11 | 0.571 | 2011 | 11 | 1.52 | 17 | 331 | 17 |
| BOURBEAU JEAN | 8 | 11 | 0.571 | 2011 | 11 | 0.94 | 17 | 856 | 11 |
| CASABURI RICHARD | 8 | 15 | 0.571 | 2011 | 15 | 0.98 | 5 | 239 | 20 |
| KESSLER R | 8 | 8 | 0.235 | 1991 | 8 | 1.25 | 20 | 1453 | 3 |
| LELLOUCHE FRANCOIS | 8 | 13 | 0.615 | 2012 | 13 | 2.42 | 10 | 350 | 16 |
| MAKE BARRY J. | 8 | 10 | 0.471 | 2008 | 10 | 0.64 | 19 | 426 | 14 |

Note(s): H_index: The h-index of the journal, which measures both the productivity and citation impact of the publications. g_index: The g-index of the journal, which gives more weight to highly-cited articles. m_index: The m-index of the journal, which is the h-index divided by the number of years since the first published paper. TP: Total Publications. TP_rank: Rank of Total Publications. TC: Total Citations. TC_rank: Rank of Total Citations. Average Citations: The average number of citations per publication. PY_start: Publication Year Start, indicating the year the journal started publication.

**Table S2 Bibliometric Indicators of High-Impact Journals**

| **Journal** | **H_index** | **IF 2023** | **JCR 2023** | **TP** | **TP_rank** | **TC** | **TC_rank** | **PY_start** |
| --- | --- | --- | --- | --- | --- | --- | --- | --- |
| CHEST | 49 | 9.5 | 1 | 149 | 1 | 5531 | 1 | 1973 |
| EUROPEAN RESPIRATORY JOURNAL | 43 | 16.6 | 1 | 84 | 4 | 4356 | 3 | 1988 |
| AMERICAN JOURNAL OF RESPIRATORY AND CRITICAL CARE MEDICINE | 39 | 19.3 | 1 | 52 | 7 | 4696 | 2 | 1995 |
| THORAX | 34 | 9 | 1 | 57 | 6 | 3231 | 4 | 1986 |
| RESPIRATORY MEDICINE | 30 | 3.5 | 2 | 96 | 2 | 1691 | 7 | 1994 |
| AMERICAN REVIEW OF RESPIRATORY DISEASE* | 26 | NA | NA | 35 | 9 | 2617 | 5 | 1978 |
| INTERNATIONAL JOURNAL OF CHRONIC OBSTRUCTIVE PULMONARY DISEASE | 22 | 2.7 | 2 | 84 | 5 | 936 | 12 | 2011 |
| RESPIRATION | 20 | 3.5 | 2 | 48 | 8 | 615 | 15 | 1980 |
| RESPIRATORY CARE | 20 | 2.4 | 2 | 87 | 3 | 974 | 11 | 2006 |
| INTENSIVE CARE MEDICINE | 18 | 27.1 | 1 | 24 | 15 | 764 | 14 | 1995 |
| COPD-JOURNAL OF CHRONIC OBSTRUCTIVE PULMONARY DISEASE | 16 | 2.2 | 3 | 33 | 10 | 472 | 20 | 2009 |
| RESPIROLOGY | 16 | 6.6 | 1 | 28 | 13 | 504 | 17 | 2003 |
| CRITICAL CARE MEDICINE | 14 | 7.7 | 1 | 18 | 17 | 606 | 16 | 1984 |
| PLOS ONE | 13 | 2.9 | 1 | 28 | 12 | 332 | 27 | 2011 |
| BMC PULMONARY MEDICINE | 12 | 2.6 | 2 | 32 | 11 | 311 | 28 | 2011 |
| CLINICAL RESPIRATORY JOURNAL | 11 | 1.9 | 3 | 26 | 14 | 123 | 63 | 2010 |
| CLINICS IN CHEST MEDICINE | 10 | 2.8 | 2 | 17 | 18 | 222 | 39 | 1986 |
| RESPIRATORY RESEARCH | 10 | 4.7 | 1 | 19 | 16 | 286 | 30 | 2007 |
| ANNALS OF THE AMERICAN THORACIC SOCIETY | 9 | 6.8 | 1 | 16 | 19 | 383 | 26 | 2015 |
| CHRONIC RESPIRATORY DISEASE | 9 | 3.5 | 2 | 16 | 20 | 141 | 58 | 2012 |

Note(s): H_index: The h-index of the journal, which measures both the productivity and citation impact of the publications. IF: Impact Factor, indicating the average number of citations to recent articles published in the journal. JCR_Quartile: The quartile ranking of the journal in the Journal Citation Reports, indicating the journal's ranking relative to others in the same field (Q1: top 25%, Q2: 25%-50%, Q3: 50%-75%, Q4: bottom 25%). TP: Total Publications. TP_rank: Rank of Total Publications. TC: Total Citations. TC_rank: Rank of Total Citations. Average Citations: The average number of citations per publication. PY_start: Publication Year Start, indicating the year the journal started publication. *: Not included in SCI list now.
